# Supplementary material for: Broader and safer clinically-relevant activities of pentadecanoic acid compared to omega-3: Evaluation of an emerging essential fatty acid across twelve primary human cell-based disease systems
Source: PubMed Central journal article supplement (PMC9135213; doi:10.1371/journal.pone.0268778), 2022-05-26
Supplement: pone.0268778.s001.pdf [file pone.0268778.s001.pdf]

**Table S1. Description of the 12 primary human cell systems included in the BioMAP® Diversity Plus system (from Eurofins/DiscoverX)**

| System  | Icon                                                                                | Cell Type                                                      | Stimulation                                                        | Disease Relevance                                                | Biomarker Readouts                                                                                                                           |
|---------|-------------------------------------------------------------------------------------|----------------------------------------------------------------|--------------------------------------------------------------------|------------------------------------------------------------------|----------------------------------------------------------------------------------------------------------------------------------------------|
| 3C      |    | Venular endothelial cells                                      | IL-1 $\beta$ , TNF $\alpha$ and IFN $\gamma$                       | Cardiovascular Disease, Chronic Inflammation                     | MCP-1, VCAM-1, TM, TF, ICAM-1, E-selectin, uPAR, IL-8, MIG, HLA-DR, Proliferation, SRB                                                       |
| 4H      |    | Venular endothelial cells                                      | IL-4 and histamine                                                 | Asthma, Allergy, Autoimmunity                                    | MCP-1, Eotaxin-3, VCAM-1, P-selectin, uPAR, SRB, VEGFR11                                                                                     |
| LPS     |    | Peripheral blood mononuclear cells + Venular endothelial cells | TLR4 ligand                                                        | Cardiovascular Disease, Chronic Inflammation                     | MCP-1, VCAM-1, TM, TF, CD40, E-selectin, CD69, IL-8, IL-1 $\alpha$ , M-CSF, sPGE <sub>2</sub> , SRB, sTNF $\alpha$                           |
| SAg     |    | Peripheral blood mononuclear cells + Venular endothelial cells | TCR ligands (1x)                                                   | Autoimmune Disease, Chronic Inflammation                         | MCP-1, CD38, CD40, E-selectin, CD69, IL-8, MIG, PBMC Cytotoxicity, Proliferation, SRB                                                        |
| BT      |    | Peripheral blood mononuclear cells + B cells                   | $\alpha$ -IgM and TCR ligands (0.001X)                             | Asthma, Allergy, Oncology, Autoimmunity                          | B cell Proliferation, PBMC Cytotoxicity, Secreted IgG, sIL-17A, sIL-17F, sIL-2, sIL-6, sTNF $\alpha$                                         |
| BF4T    |    | Bronchial epithelial cells + Dermal fibroblasts                | TNF $\alpha$ and IL-4                                              | Asthma, Allergy, Fibrosis, Lung Inflammation                     | MCP-1, Eotaxin-3, VCAM-1, ICAM-1, CD90, IL-8, IL-1 $\alpha$ , Keratin 8/18, MMP-1, MMP-3, MMP-9, PAI-1, SRB, tPA, uPA                        |
| BE3C    |    | Bronchial epithelial cells                                     | IL-1 $\beta$ , TNF $\alpha$ and IFN $\gamma$                       | Lung Inflammation, COPD                                          | ICAM-1, uPAR, IP-10, I-TAC, IL-8, MIG, EGFR, HLA-DR, IL-1 $\alpha$ , Keratin 8/18, MMP-1, MMP-9, PAI-1, SRB, tPA, uPA                        |
| CASM3C  |   | Coronary artery smooth muscle cells                            | IL-1 $\beta$ , TNF $\alpha$ and IFN $\gamma$                       | Cardiovascular Inflammation, Restenosis                          | MCP-1, VCAM-1, TM, TF, uPAR, IL-8, MIG, HLA-DR, IL-6, LDLR, M-CSF, PAI-1, Proliferation, SAA, SRB                                            |
| HDF3CGF |  | Dermal fibroblasts                                             | IL-1 $\beta$ , TNF $\alpha$ , IFN $\gamma$ , EGF, bFGF and PDGF-BB | Fibrosis, Chronic Inflammation                                   | MCP-1, VCAM-1, ICAM-1, Collagen I, Collagen III, IP-10, I-TAC, IL-8, MIG, EGFR, M-CSF, MMP-1, PAI-1, Proliferation_72hr, SRB, TIMP-1, TIMP-2 |
| KF3CT   |  | Keratinocytes + Dermal fibroblasts                             | IL-1 $\beta$ , TNF $\alpha$ , IFN $\gamma$ and TGF $\beta$         | Psoriasis, Dermatitis, Skin Biology                              | MCP-1, ICAM-1, IP-10, IL-8, MIG, IL-1 $\alpha$ , MMP-9, PAI-1, SRB, TIMP-2, uPA                                                              |
| MyoF    |  | Lung fibroblasts                                               | TNF $\alpha$ and TGF $\beta$                                       | Fibrosis, Chronic Inflammation, Wound Healing, Matrix Remodeling | $\alpha$ -SM Actin, bFGF, VCAM-1, Collagen-I, Collagen-III, Collagen-IV, IL-8, Decorin, MMP-1, PAI-1, TIMP-1, SRB                            |
| /Mphg   |  | Venular endothelial cells + Macrophages                        | TLR2 ligand                                                        | Cardiovascular Inflammation, Restenosis, Chronic Inflammation    | MCP-1, MIP-1 $\alpha$ , VCAM-1, CD40, E-selectin, CD69, IL-8, IL-1 $\alpha$ , M-CSF, sIL-10, SRB, SRB-Mphg                                   |
